# Supplementary material
Source: publisher figshare collection journal article supplement (https://rs.figshare.com/ndownloader/files/21907218)
Supplement: Supplementary file 1 [file 21907218]

## Sheet: Table S1
Table S1. Trait data, colour dimorphism, and colour data by species. For colour dimorphism, '0' indicates colour similarity and '1' indicates colour difference between initial and terminal phase fish. The 'Proportion colour dimorphic' column summarises colour dimorphism data by indicating the proportion of body regions that were scored colour dimorphic relative to the total number of body regions…
												Colour group expression
				Proportion colour dimorphic	Colour dimorphism							Initial phase					Terminal phase
Species	Habitat	Mating system	Sex allocation		Head	Body	Pectoral fin	Pelvic fin	Anal fin	Dorsal fin	Caudal fin	black	yellow	red	white	blue	black	yellow	red	white	blue
Bodianus diplotaenia	coral reef associated	lek-like	monandric	1	1	1	1	1	1	1	1	1	1	1	1	0	1	1	1	1	1
Bodianus eclancheri	non-coral reef	promiscuous	gonochorous	0	0	0	0	0	0	0	0	1	1	0	1	0	1	1	0	1	0
Bodianus rufus	coral reef associated	haremic	monandric	0	0	0	0	0	0	0	0	0	1	1	0	1	0	1	1	0	1
Bodianus scrofa	non-coral reef	haremic	monandric	0	0	0	0	0	0	0	0	1	1	1	1	0	1	1	1	1	0
Bolbometopon muricatum	coral reef exclusive	lek-like	gonochorous	0	0	0	0	0	0	0	0	1	0	1	0	1	1	0	1	0	1
Calotomus carolinus	coral reef associated	lek-like	monandric	1	1	1	1	1	1	1	1	1	0	1	1	0	0	0	1	0	1
Calotomus spinidens	non-coral reef	lek-like	diandric	0	0	0	0	0	0	0	0	1	0	1	1	0	1	0	1	1	0
Cheilinus undulatus	coral reef exclusive	lek-like	monandric	1	1	1	1	1	1	1	1	1	1	0	1	1	1	0	1	0	1
Chlorurus spilurus	coral reef exclusive	lek-like	monandric	1	1	1	1	1	1	1	1	1	0	1	1	0	0	1	1	0	1
Cirrhilabrus exquisitus	coral reef exclusive	promiscuous	monandric	0.857143	1	1	0	1	1	1	1	1	0	1	1	0	1	1	1	1	1
Clepticus parrae	coral reef exclusive	promiscuous	monandric	0	0	0	0	0	0	0	0	1	0	1	0	1	1	1	1	0	1
Coris auricularis	coral reef associated	haremic	monandric	0.571429	1	1	0	NA	0	1	1	1	0	1	1	1	1	1	1	1	1
Coris batuensis	coral reef exclusive	haremic	monandric	0	0	0	0	0	0	0	0	1	0	1	1	1	1	0	1	1	1
Coris dorsomacula	coral reef associated	haremic	monandric	0.714286	1	1	0	0	1	1	1	1	1	1	1	0	1	1	1	1	1
Coris julis	non-coral reef	lek-like	diandric	0.714286	1	1	0	0	1	1	1	1	1	1	1	0	1	1	1	1	1
Cryptotomus roseus	coral reef associated	lek-like	monandric	0.571429	1	1	0	0	0	1	1	1	0	1	1	0	1	1	1	1	1
Ctenolabrus rupestris	non-coral reef	lek-like	gonochorous	0	0	0	0	0	0	0	0	1	0	1	1	0	1	0	1	1	0
Epibulus brevis	coral reef associated	lek-like	monandric	0.285714	0	1	1	NA	0	0	0	1	1	0	0	0	1	1	0	1	0
Epibulus insidiator	coral reef exclusive	lek-like	monandric	0.571429	1	1	1	0	0	0	1	1	1	1	1	0	1	1	1	1	0
Gomphosus varius	coral reef associated	lek-like	monandric	1	1	1	1	1	1	1	1	1	0	0	1	0	1	1	1	0	1
Halichoeres bivittatus	coral reef associated	lek-like	diandric	0	0	0	0	0	0	0	0	1	1	0	1	1	1	1	1	1	1
Halichoeres californica	non-coral reef	promiscuous	gonochorous	0	0	0	0	0	0	0	0	1	0	1	1	0	1	0	1	1	0
Halichoeres garnoti	coral reef associated	lek-like	monandric	0.571429	1	1	0	0	0	1	1	1	1	0	1	1	1	1	1	1	1
Halichoeres maculipinna	coral reef associated	lek-like	diandric	0.571429	0	1	0	0	1	1	1	1	1	1	1	1	1	1	1	0	1
Halichoeres margaritaceus	coral reef associated	haremic	monandric	0.142857	0	0	0	0	0	0	1	1	0	1	1	1	1	0	1	0	1
Halichoeres marginatus	coral reef exclusive	lek-like	diandric	1	1	1	1	1	1	1	1	1	0	1	1	1	1	1	1	0	1
Halichoeres melanochir	coral reef associated	lek-like	monandric	0	0	0	0	0	0	0	0	1	1	1	1	1	1	1	1	1	1
Halichoeres melanurus	coral reef associated	lek-like	diandric	0.714286	1	1	0	0	1	1	1	1	0	1	0	1	1	1	1	0	1
Halichoeres miniatus	non-coral reef	haremic	monandric	0.571429	1	0	0	0	1	1	1	1	0	1	1	0	1	0	1	1	1
Halichoeres pictus	coral reef exclusive	lek-like	diandric	0.714286	1	1	0	NA	1	1	1	1	0	0	1	0	1	1	1	1	1
Halichoeres poeyi	coral reef associated	lek-like	diandric	0.714286	1	1	0	0	1	1	1	1	1	1	1	1	1	1	1	1	1
Halichoeres semicinctus	non-coral reef	lek-like	monandric	0	0	0	0	0	0	0	0	1	0	1	1	1	1	0	1	1	1
Halichoeres tenuispinis	coral reef associated	lek-like	diandric	0.714286	1	1	0	0	1	1	1	1	0	0	1	0	1	1	1	0	1
Halichoeres trimaculatus	coral reef exclusive	lek-like	diandric	0.428571	0	0	0	0	1	1	1	1	0	1	1	1	1	1	1	1	1
Iniistius pentadactylus	non-coral reef	haremic	monandric	0	0	0	0	0	0	0	0	1	0	1	1	1	1	0	1	1	1
Labroides dimidiatus	coral reef exclusive	haremic	monandric	0	0	0	0	0	0	0	0	1	1	0	1	1	1	1	0	1	1
Labrus bergylta	non-coral reef	lek-like	monandric	0	0	0	0	0	0	0	0	1	0	0	1	0	1	0	0	1	0
Labrus merula	non-coral reef	lek-like	monandric	0	0	0	0	0	0	0	0	1	0	0	1	1	1	0	0	1	1
Labrus mixtus	non-coral reef	lek-like	diandric	0.857143	1	1	0	1	1	1	1	1	0	1	1	0	1	1	1	0	1
Labrus viridis	non-coral reef	lek-like	monandric	0	0	0	0	0	0	0	0	1	0	0	1	1	1	0	0	1	1
Lachnolaimus maximus	coral reef associated	haremic	monandric	0.285714	0	0	1	1	0	0	0	1	0	0	1	0	1	1	0	1	0
Leptoscarus vaigiensis	non-coral reef	promiscuous	gonochorous	0	0	0	0	0	0	0	0	1	0	0	1	1	1	0	0	1	1
Notolabrus fucicola	non-coral reef	promiscuous	gonochorous	0	0	0	0	0	0	0	0	1	1	0	1	1	1	1	0	1	1
Notolabrus gymnogenis	non-coral reef	lek-like	monandric	1	1	1	1	1	1	1	1	1	0	1	1	0	1	1	1	1	1
Notolabrus tetricus	non-coral reef	lek-like	monandric	0.857143	0	1	1	1	1	1	1	1	0	0	1	0	1	1	0	1	0
Parajulis poecilepterus	coral reef associated	lek-like	diandric	0.285714	1	1	0	0	0	0	0	1	0	0	1	0	1	1	1	1	1
Pictilabrus laticlavius	non-coral reef	lek-like	monandric	0.857143	1	1	1	0	1	1	1	1	0	1	1	1	1	1	1	1	1
Pseudolabrus sieboldi	non-coral reef	lek-like	diandric	0.571429	0	0	1	0	1	1	1	1	1	1	1	0	1	1	1	1	0
Pteragogus flagellifer	coral reef associated	lek-like	monandric	0	0	0	0	0	0	0	0	1	0	0	1	0	1	0	0	1	0
Scarus ferrugineus	coral reef associated	lek-like	diandric	1	1	1	1	1	1	1	1	1	1	1	1	1	0	1	1	0	1
Scarus forsteni	coral reef exclusive	lek-like	diandric	1	1	1	1	1	1	1	1	1	0	1	1	1	0	0	1	0	1
Scarus frenatus	coral reef exclusive	haremic	monandric	1	1	1	1	1	1	1	1	1	0	1	1	0	0	0	1	0	1
Scarus globiceps	coral reef exclusive	lek-like	diandric	1	1	1	1	1	1	1	1	1	0	0	1	0	0	1	1	0	1
Scarus iseri	coral reef associated	haremic	diandric	0.714286	1	1	0	0	1	1	1	1	1	0	1	0	1	1	1	1	1
Scarus niger	coral reef exclusive	haremic	monandric	1	1	1	1	1	1	1	1	1	0	1	1	1	0	1	1	0	1
Scarus psittacus	coral reef exclusive	lek-like	diandric	1	1	1	1	1	1	1	1	1	0	1	1	0	0	1	1	0	1
Scarus rivulatus	coral reef associated	lek-like	diandric	1	1	1	1	1	1	1	1	1	0	0	1	0	0	1	1	0	1
Scarus rubroviolaceus	coral reef associated	haremic	diandric	1	1	1	1	1	1	1	1	1	0	1	1	0	0	1	1	0	1
Scarus schlegeli	coral reef exclusive	lek-like	diandric	1	1	1	1	1	1	1	1	1	0	0	1	0	1	1	1	1	1
Scarus taeniopterus	coral reef associated	haremic	diandric	0.714286	1	1	0	0	1	1	1	1	1	0	1	0	0	1	1	1	1
Scarus vetula	coral reef associated	haremic	diandric	1	1	1	1	1	1	1	1	1	0	0	1	0	0	1	1	0	1
Semicossyphus pulcher	non-coral reef	lek-like	monandric	0.857143	1	1	1	NA	1	1	1	0	0	1	1	0	1	0	1	1	0
Sparisoma atomarium	coral reef associated	haremic	monandric	0.714286	1	1	0	NA	1	1	1	0	1	1	1	0	1	1	1	1	1
Sparisoma aurofrenatum	coral reef associated	haremic	monandric	0.571429	1	1	0	1	0	0	1	1	0	1	1	1	1	1	1	1	1
Sparisoma chrysopterum	coral reef associated	lek-like	gonochorous	0.857143	1	1	0	1	1	1	1	1	0	1	1	0	1	1	1	0	1
Sparisoma cretense	non-coral reef	lek-like	gonochorous	0.857143	1	1	0	1	1	1	1	1	0	1	1	0	1	1	1	0	0
Sparisoma frondosum	coral reef associated	haremic	monandric	1	1	1	1	1	1	1	1	1	1	1	1	0	1	1	0	0	1
Sparisoma radians	coral reef associated	haremic	monandric	0.285714	0	0	0	0	1	0	1	1	0	0	1	1	1	0	1	1	1
Sparisoma rubripinne	coral reef associated	lek-like	gonochorous	0.857143	1	1	1	1	1	1	0	1	1	1	1	0	1	1	0	1	1
Sparisoma viride	coral reef exclusive	lek-like	gonochorous	1	1	1	1	1	1	1	1	1	0	1	1	0	0	1	1	0	1
Stethojulis strigiventer	coral reef associated	haremic	diandric	0.142857	0	1	0	0	0	0	0	1	0	0	1	1	1	1	1	1	1
Symphodus caeruleus	non-coral reef	lek-like	gonochorous	1	1	1	1	1	1	1	1	1	0	0	1	1	1	0	0	0	1
Symphodus cinereus	non-coral reef	lek-like	gonochorous	0	0	0	0	0	0	0	0	1	0	0	1	0	1	0	0	1	0
Symphodus mediterraneus	non-coral reef	lek-like	gonochorous	0	0	0	0	0	0	0	0	1	1	1	1	1	1	1	1	1	1
Symphodus melanocercus	non-coral reef	lek-like	diandric	0	0	0	0	0	0	0	0	1	0	0	1	1	1	0	0	1	1
Symphodus melops	non-coral reef	lek-like	gonochorous	0.857143	1	0	1	1	1	1	1	1	0	0	1	1	1	0	0	1	1
Symphodus ocellatus	non-coral reef	lek-like	gonochorous	0	0	0	0	0	0	0	0	1	0	1	1	1	1	0	1	1	1
Symphodus roissali	non-coral reef	lek-like	gonochorous	0	0	0	0	0	0	0	0	1	0	0	1	1	1	0	0	1	1
Symphodus tinca	non-coral reef	lek-like	gonochorous	0.857143	0	1	1	1	1	1	1	1	0	0	1	0	1	1	1	1	1
Thalassoma bifasciatum	coral reef associated	lek-like	diandric	0.714286	1	1	0	NA	1	1	1	1	1	0	1	0	1	0	0	1	1
Thalassoma duperrey	coral reef associated	lek-like	diandric	0	0	0	0	0	0	0	0	0	0	1	1	1	0	0	1	1	1
Thalassoma hardwicke	coral reef exclusive	lek-like	diandric	0	0	0	0	0	0	0	0	1	0	1	1	1	1	0	1	1	1
Thalassoma lucasanum	coral reef associated	lek-like	diandric	0.857143	1	1	0	1	1	1	1	1	1	1	1	0	0	1	1	0	1
Thalassoma lunare	coral reef associated	lek-like	diandric	0	0	0	0	0	0	0	0	1	1	1	0	1	0	1	1	0	1
Thalassoma lutescens	coral reef associated	lek-like	diandric	0.714286	1	1	1	NA	1	1	0	1	1	1	0	1	0	1	1	0	1
Thalassoma pavo	non-coral reef	lek-like	diandric	0.285714	1	1	0	0	0	0	0	1	0	1	1	1	1	0	1	0	1
Xyrichtys martinicensis	non-coral reef	haremic	monandric	0.142857	1	0	0	0	0	0	0	1	0	1	1	0	1	1	0	1	1
Xyrichtys novacula	non-coral reef	haremic	monandric	0	0	0	0	0	0	0	0	0	0	1	1	1	0	0	1	1	1
Xyrichtys splendens	non-coral reef	haremic	monandric	0.428571	0	0	0	0	1	1	1	1	0	1	1	1	1	0	1	1	1

## Sheet: Table S4
Table S4. Evolutionary models best-fit to colour dimorphism as predicted separately by habitat association, mating system and sex allocation. Models with ΔAICc values less than two were considered to have comparable support (Comp. model). Regime specific parameters are denoted as: (N) non-coral reef; (A) coral reef associated; (E) coral reef exclusive; (P) promiscuous; (H) harem polygyny; (L) lek…
Trait	No. retained iterations	Best model	ΔAICc	AICc weight	Comp. model	ΔAICc	AICc weight	Alpha [95% CIs]	Sigma squared [95% CIs]	Theta [95% CIs]	% power best-fit model	% power class of model
Habitat association	120	OUM	0	0.834	–	–	–	0.442 [0.168–6.387]	89.270 [32.847–1244.096]	N: 4.376 [0.436–7.987]	0.8667	0.975
										A: −1.211 [−5.679–3.550]
										E: −8.770 [−14.566–−3.891]
Mating system	115	OUMV	0.766	0.682	–	–	–	0.132 [0.062–5.166]	P: 23.933 [0.000–850.175]	P: 17.148 [0.871–102.167]	0.7913	0.9391
									H: 12.057 [4.990–927.264]	H: 5.882 [−1.820–9.271]
									L: 43.926 [6.298–973.890]	L: −0.314 [−37.828–14.678 ]
Sex allocation	120	OUM	0.595	0.386	OU1	0.606	0.384	0.255 [0.114–5.932]	58.527 [25.123–1185.123]	G: 5.763 [0.465–10.509]	0.625	0.7583
					OUMV	1.63	0.23			M: 0.515 [−6.563–6.510]
										D: −3.338 [−10.732–3.376]
